# Supplementary material for: Anti-Inflammatory and Protein Tyrosine Phosphatase 1B Inhibitory Metabolites from the Antarctic Marine-Derived Fungal Strain Penicillium glabrum SF-7123
Source: PubMed Central journal article supplement (PMC7281349; doi:10.3390/md18050247), 2020-05-09
Supplement: marinedrugs-18-00247-s001.pdf [file marinedrugs-18-00247-s001.pdf]

## *Supplementary Material*

### **Anti-inflammatory and protein tyrosine phosphatase 1B inhibitory metabolites from an Antarctic marine-derived fungal strain *Penicillium glabrum* SF-7123**

Tran Minh Ha<sup>1†</sup>, Dong-Cheol Kim<sup>1†</sup>, Jae Hak Sohn<sup>2</sup>, Joung Han Yim<sup>3\*</sup>, and Hyuncheol Oh<sup>1\*</sup>

<sup>1</sup> Institute of Pharmaceutical Research and Development, College of Pharmacy, Wonkwang University, Iksan 54538, Republic of Korea; [minhha19@oulook.com](mailto:minhha19@oulook.com) (T.M.H.); [kimman07@hanmail.net](mailto:kimman07@hanmail.net) (D.K.)

<sup>2</sup> College of Medical and Life Sciences, Silla University, Busan 46958, Republic of Korea; [jhsohn@silla.ac.kr](mailto:jhsohn@silla.ac.kr) (J.H.S.)

<sup>3</sup> Korea Polar Research Institute, KORDI, 7-50 Songdo-dong, Yeonsu-gu, Incheon 21990, Republic of Korea

\* Correspondence: [jhyim@kopri.re.kr](mailto:jhyim@kopri.re.kr) (J.H.Y.); [hoh@wku.ac.kr](mailto:hoh@wku.ac.kr) (H.O.); Tel.: +82-32-760-5540 (J.H.Y.); +82-63-850-6815 (H.O.)

† These authors contributed equally.

## List of supplementary data

| Content.....                                                                                     | Page |
|--------------------------------------------------------------------------------------------------|------|
| Figure S1. HRESI mass spectrum of compound <b>1</b> .....                                        | S3   |
| Figure S2. <sup>1</sup> H NMR spectrum (400 MHz, CD <sub>3</sub> OD) of compound <b>1</b> .....  | S4   |
| Figure S3. <sup>13</sup> C NMR spectrum (100 MHz, CD <sub>3</sub> OD) of compound <b>1</b> ..... | S5   |
| Figure S4. COSY spectrum (400 MHz, CD <sub>3</sub> OD) of compound <b>1</b> .....                | S6   |
| Figure S5. HMBC spectrum (400 MHz, CD <sub>3</sub> OD) of compound <b>1</b> .....                | S7   |
| Figure S6. <sup>1</sup> H NMR spectrum (400 MHz, CD <sub>3</sub> OD) of compound <b>2</b> .....  | S8   |
| Figure S7: <sup>1</sup> H NMR spectrum (400 MHz, CD <sub>3</sub> OD) of compound <b>3</b> .....  | S9   |
| Figure S8: <sup>1</sup> H NMR spectrum (400 MHz, CD <sub>3</sub> OD) of compound <b>4</b> .....  | S10  |
| Figure S9: <sup>1</sup> H NMR spectrum (400 MHz, CDCl <sub>3</sub> ) of compound <b>5</b> .....  | S11  |

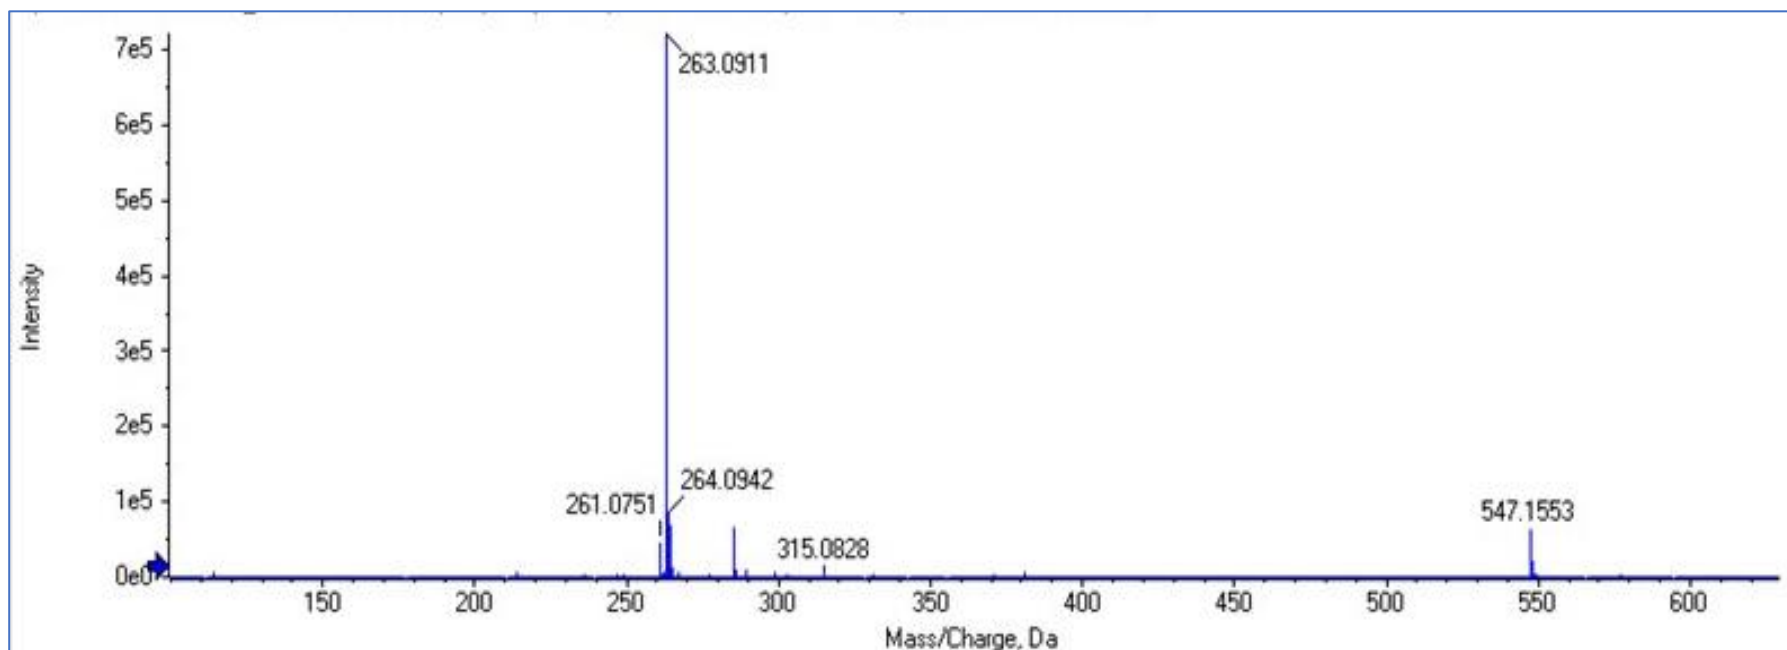

Figure S1. HRESI mass spectrum of compound **1**

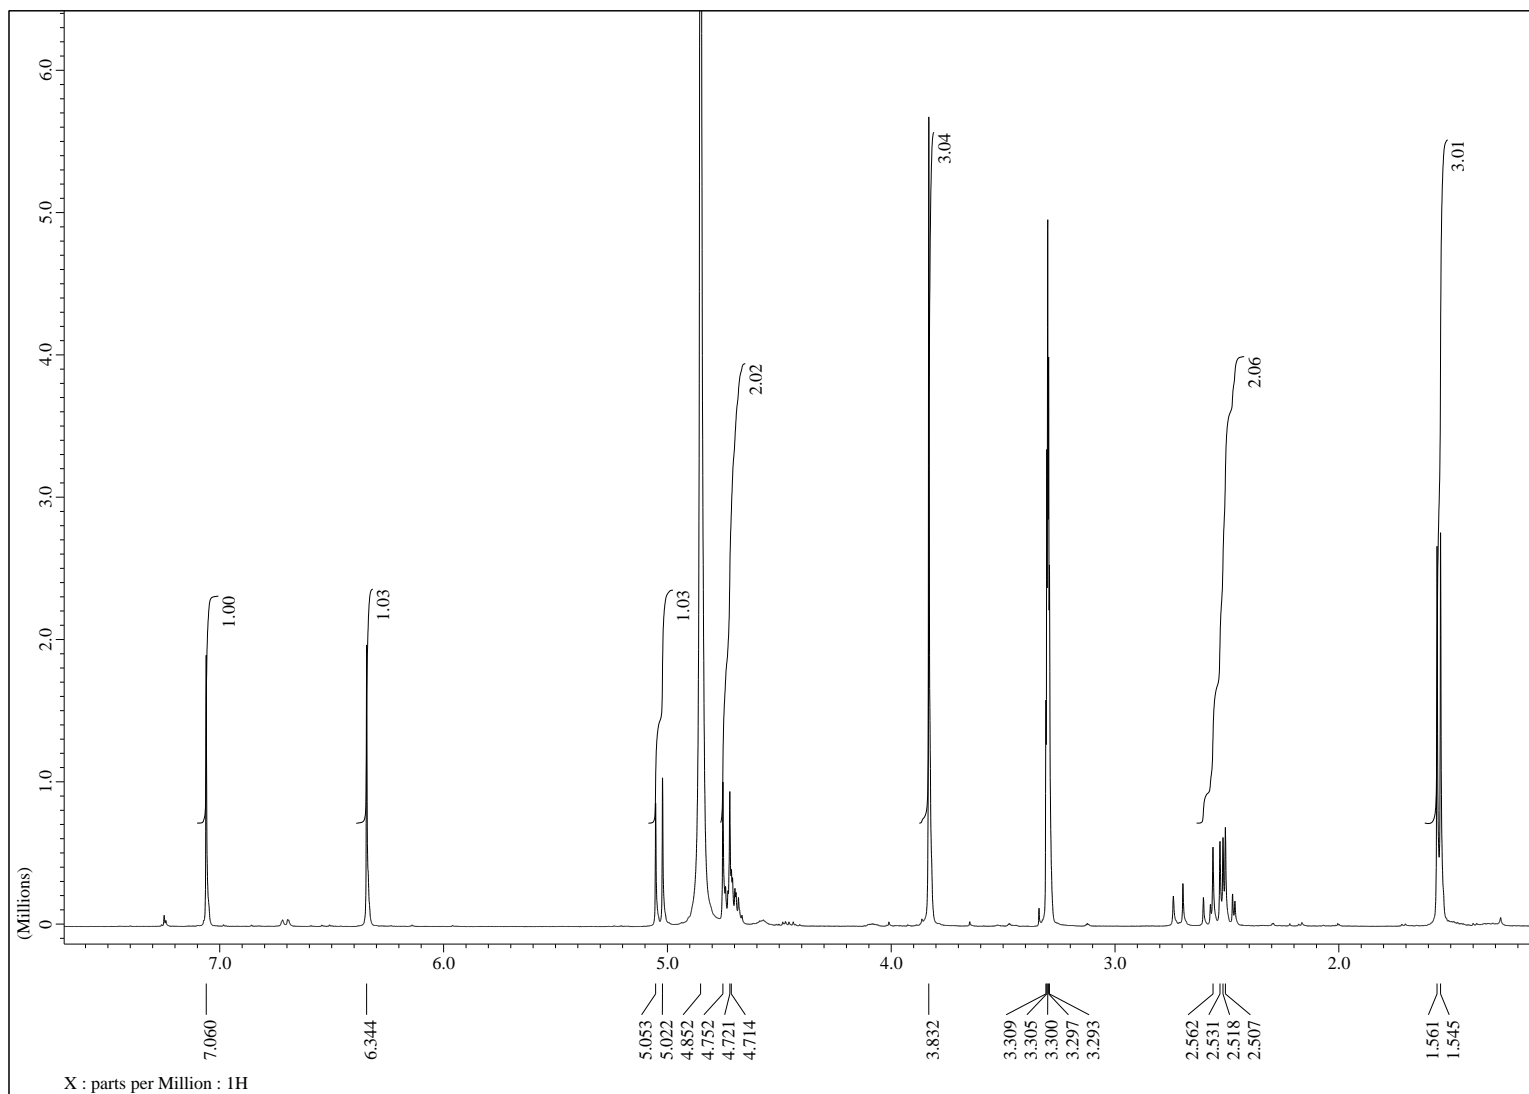

Figure S2.  $^1\text{H}$  NMR spectrum (400 MHz,  $\text{CD}_3\text{OD}$ ) of compound **1**

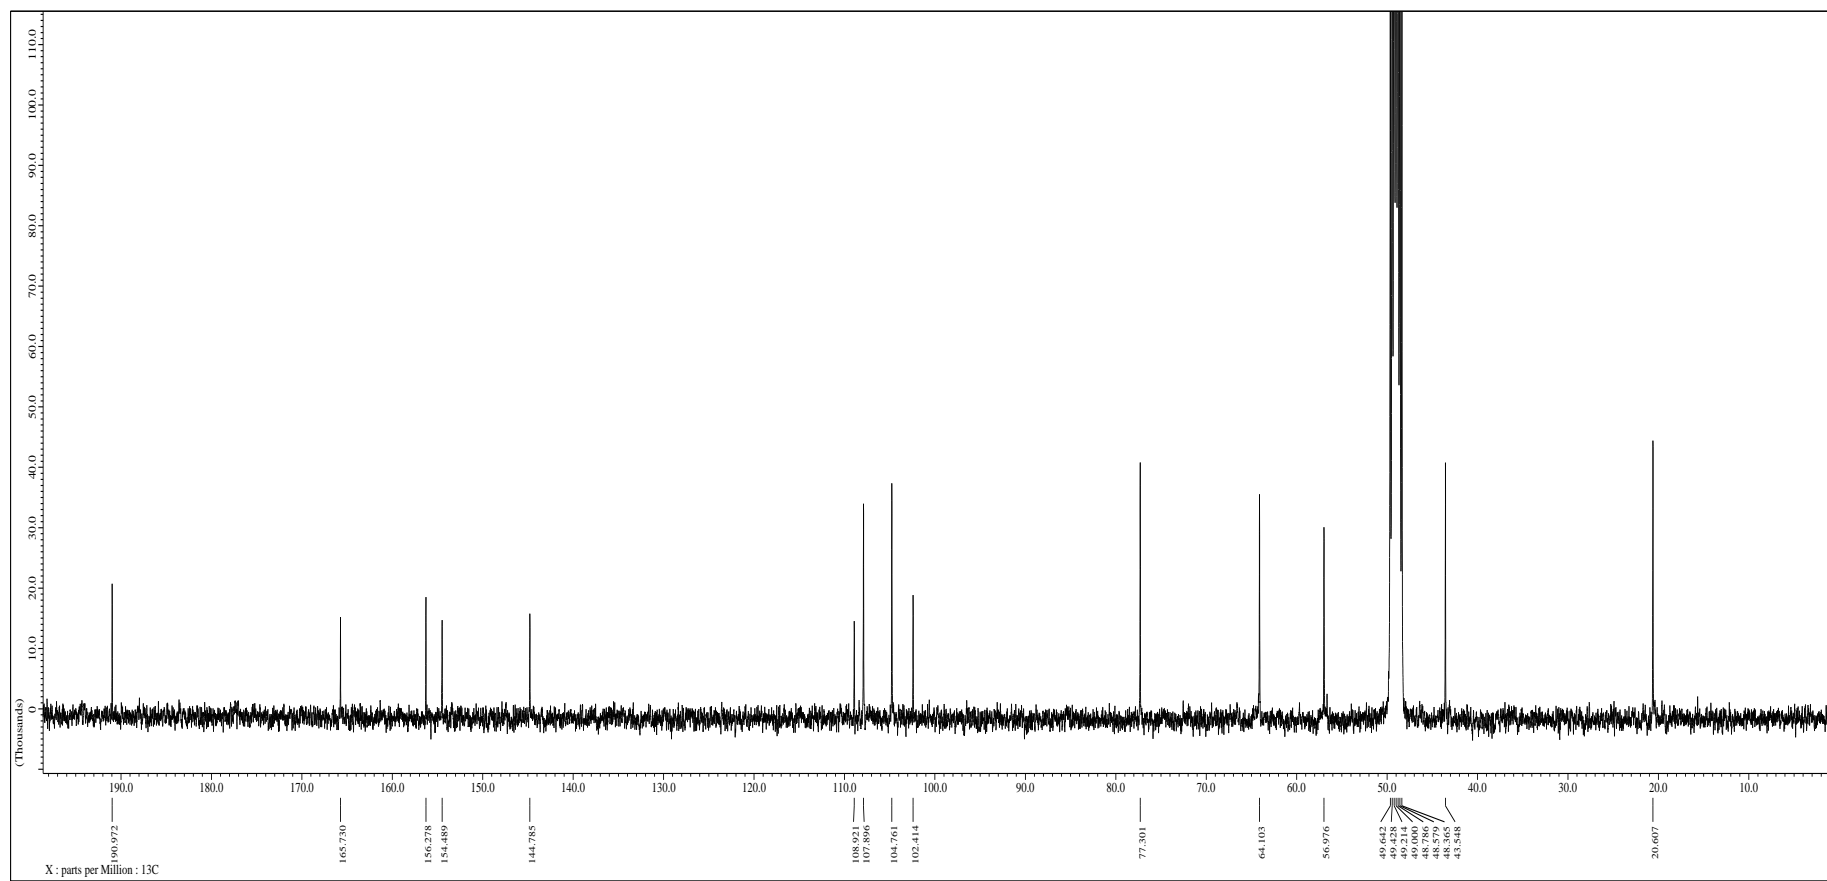

Figure S3.  $^{13}\text{C}$  NMR spectrum (100 MHz,  $\text{CD}_3\text{OD}$ ) of compound **1**

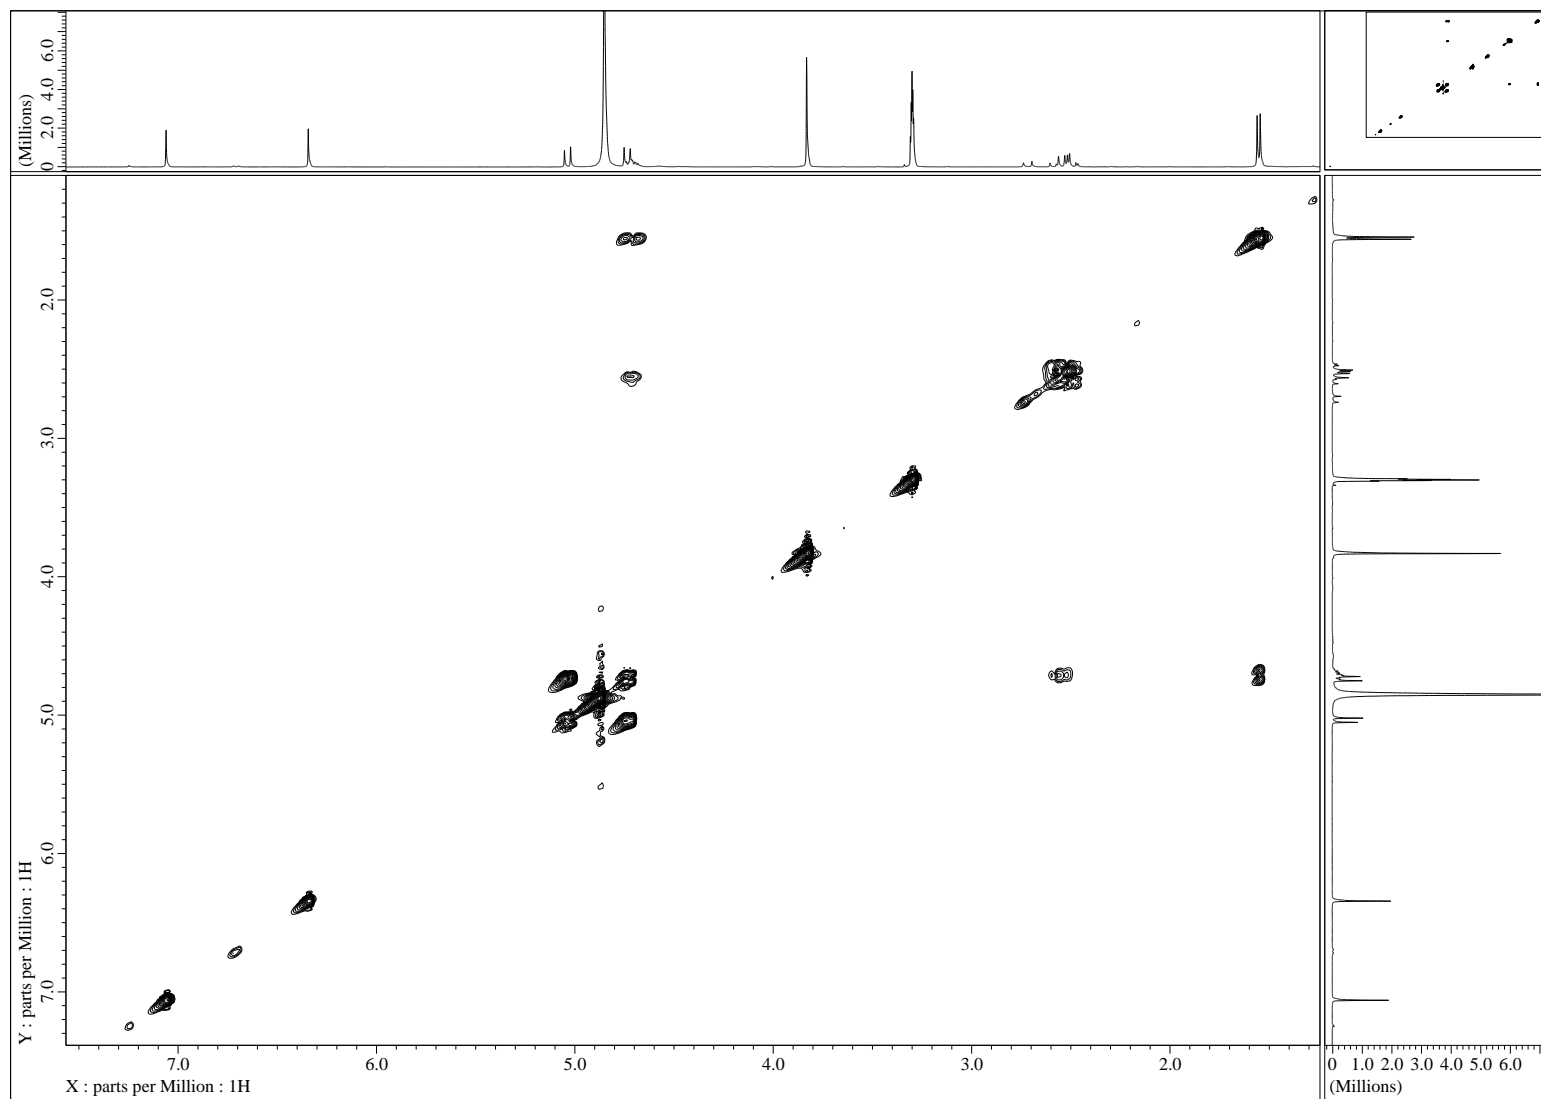

Figure S4. COSY spectrum (400 MHz, CD<sub>3</sub>OD) of compound **1**  
S6

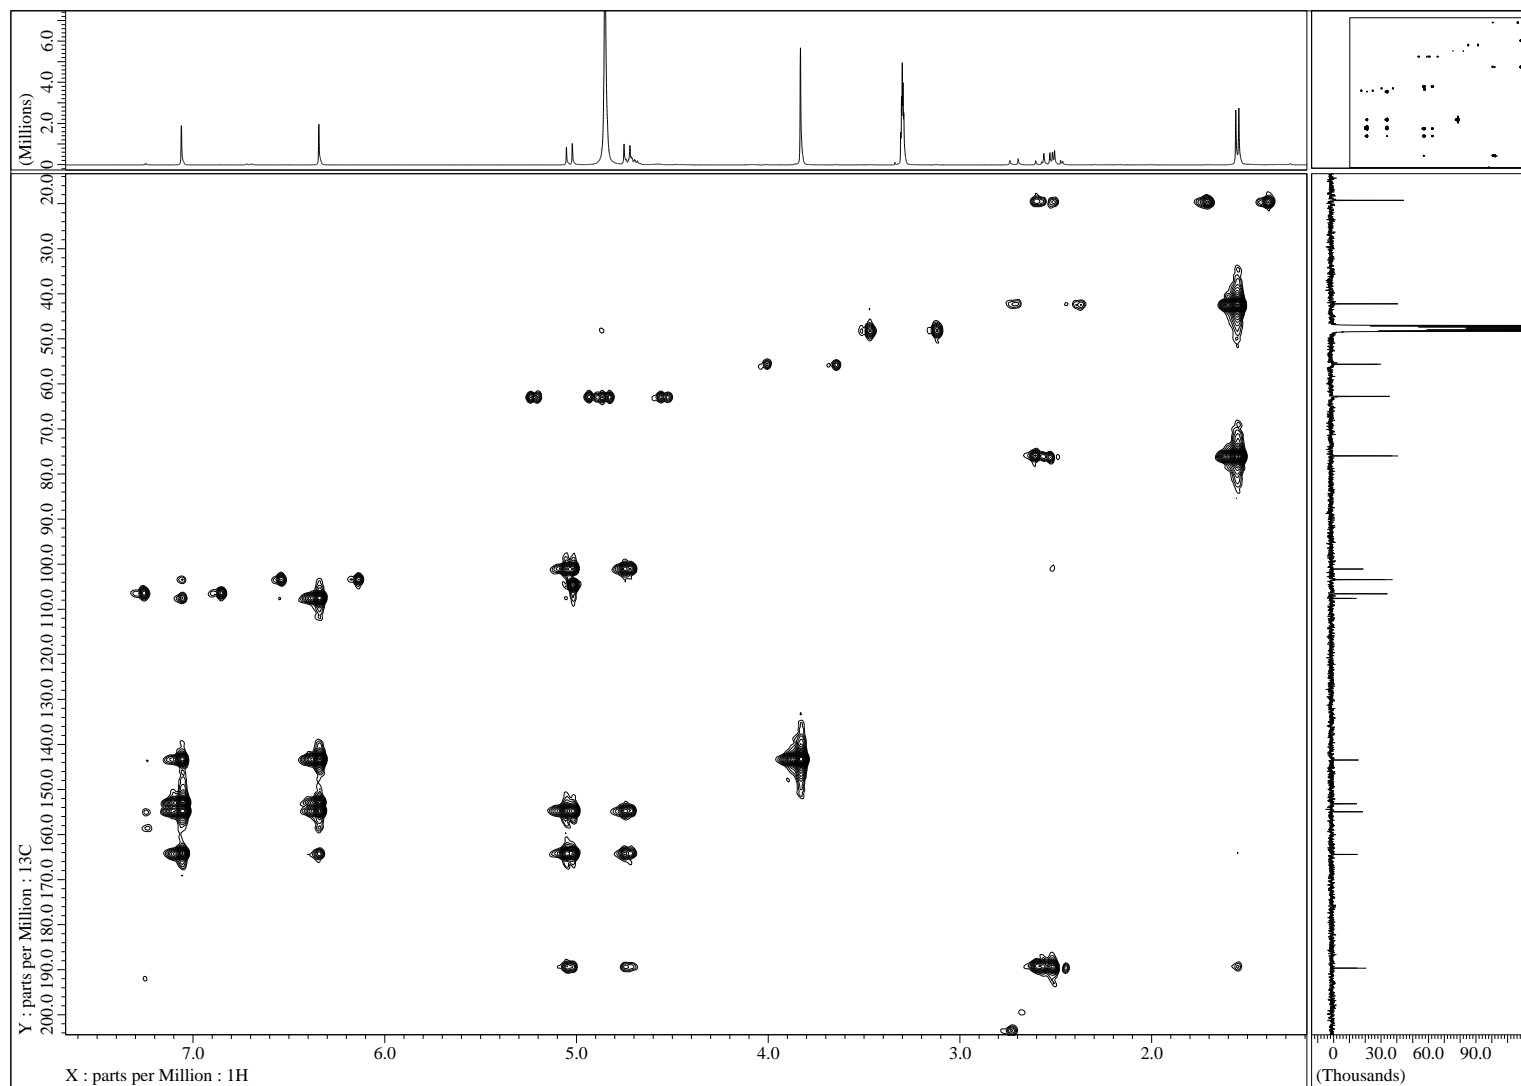

Figure S5. HMBC spectrum (400 MHz, CD<sub>3</sub>OD) of compound **1**

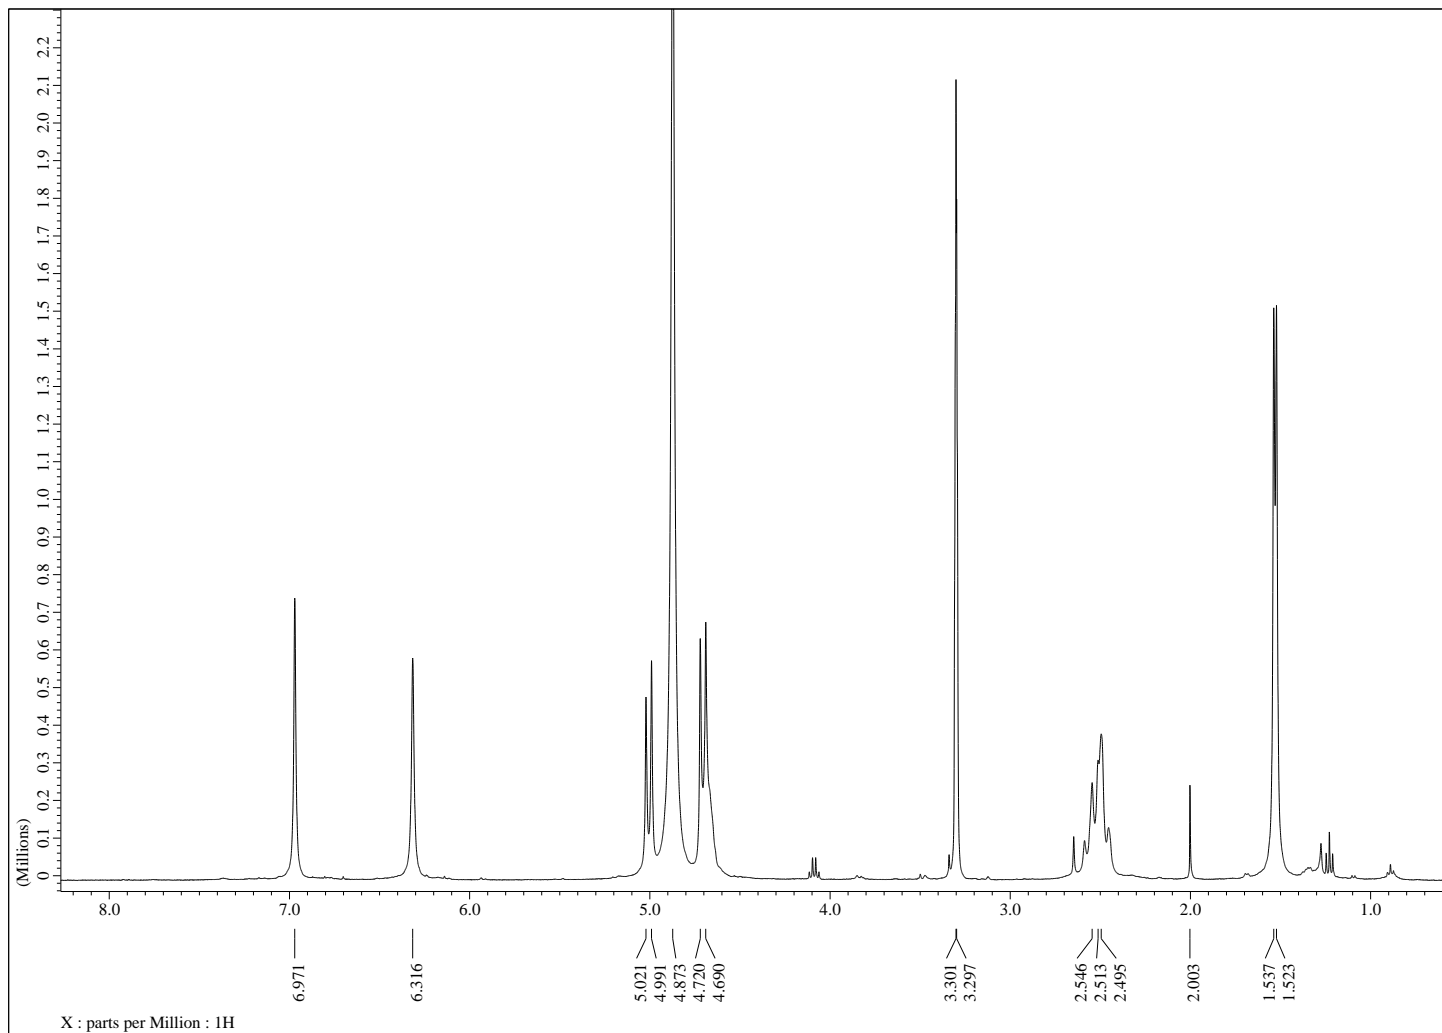

Figure S6.  $^1\text{H}$  NMR spectrum (400 MHz,  $\text{CD}_3\text{OD}$ ) of compound **2**  
S8



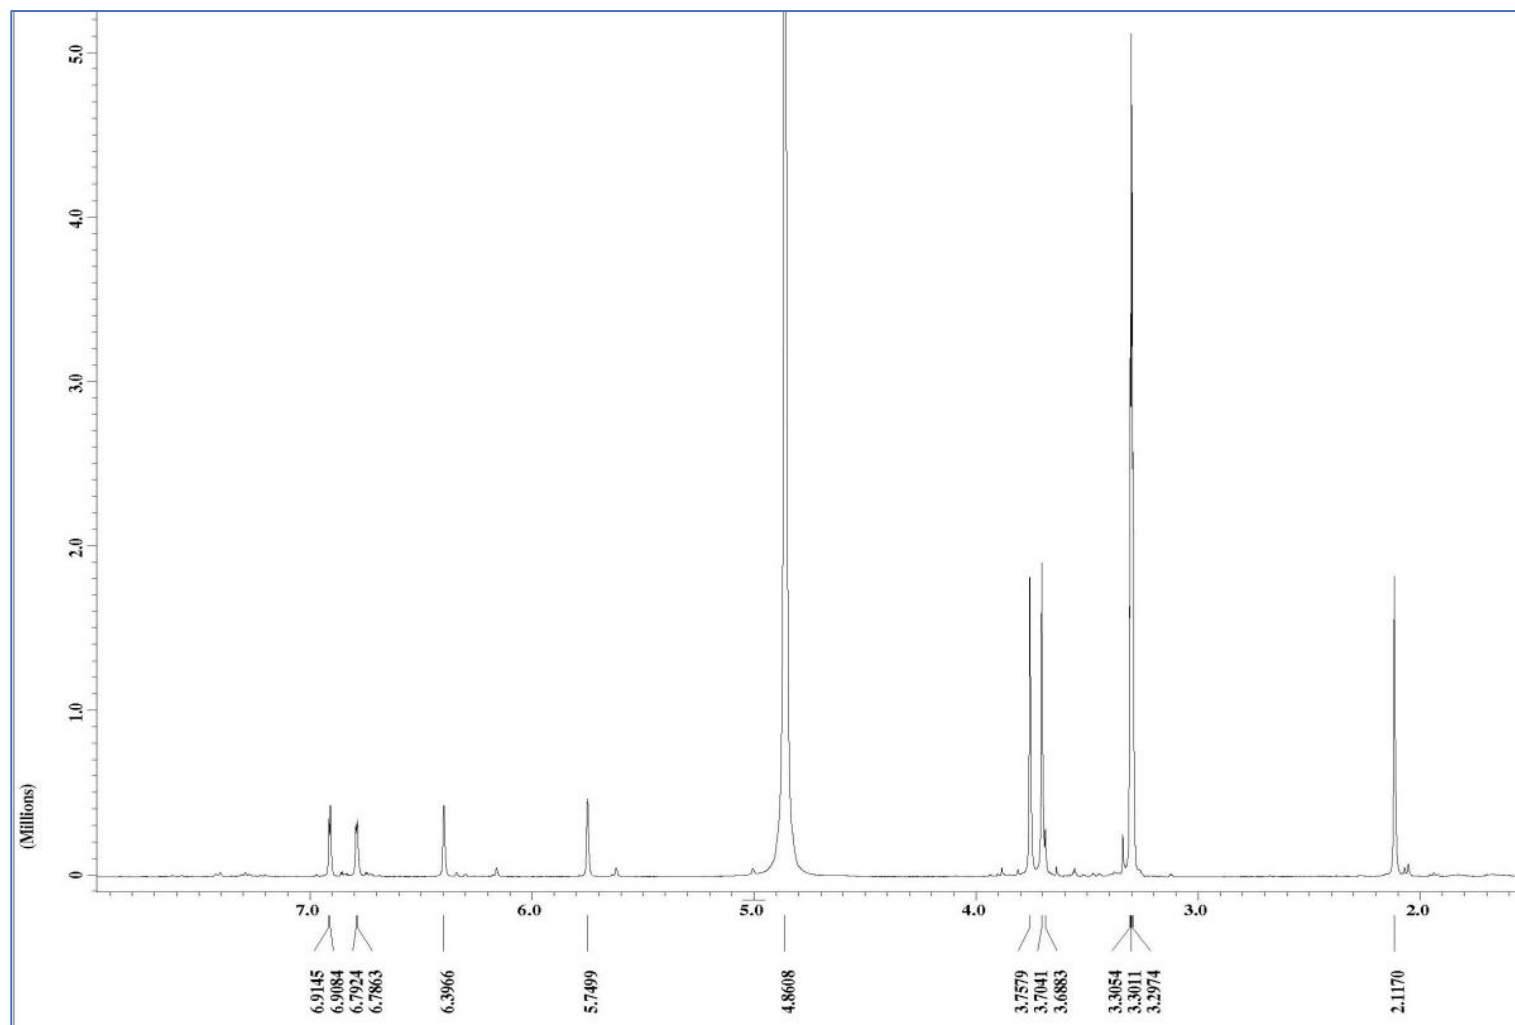

Figure S7.  $^1\text{H}$  NMR spectrum (400 MHz,  $\text{CD}_3\text{OD}$ ) of compound **3**

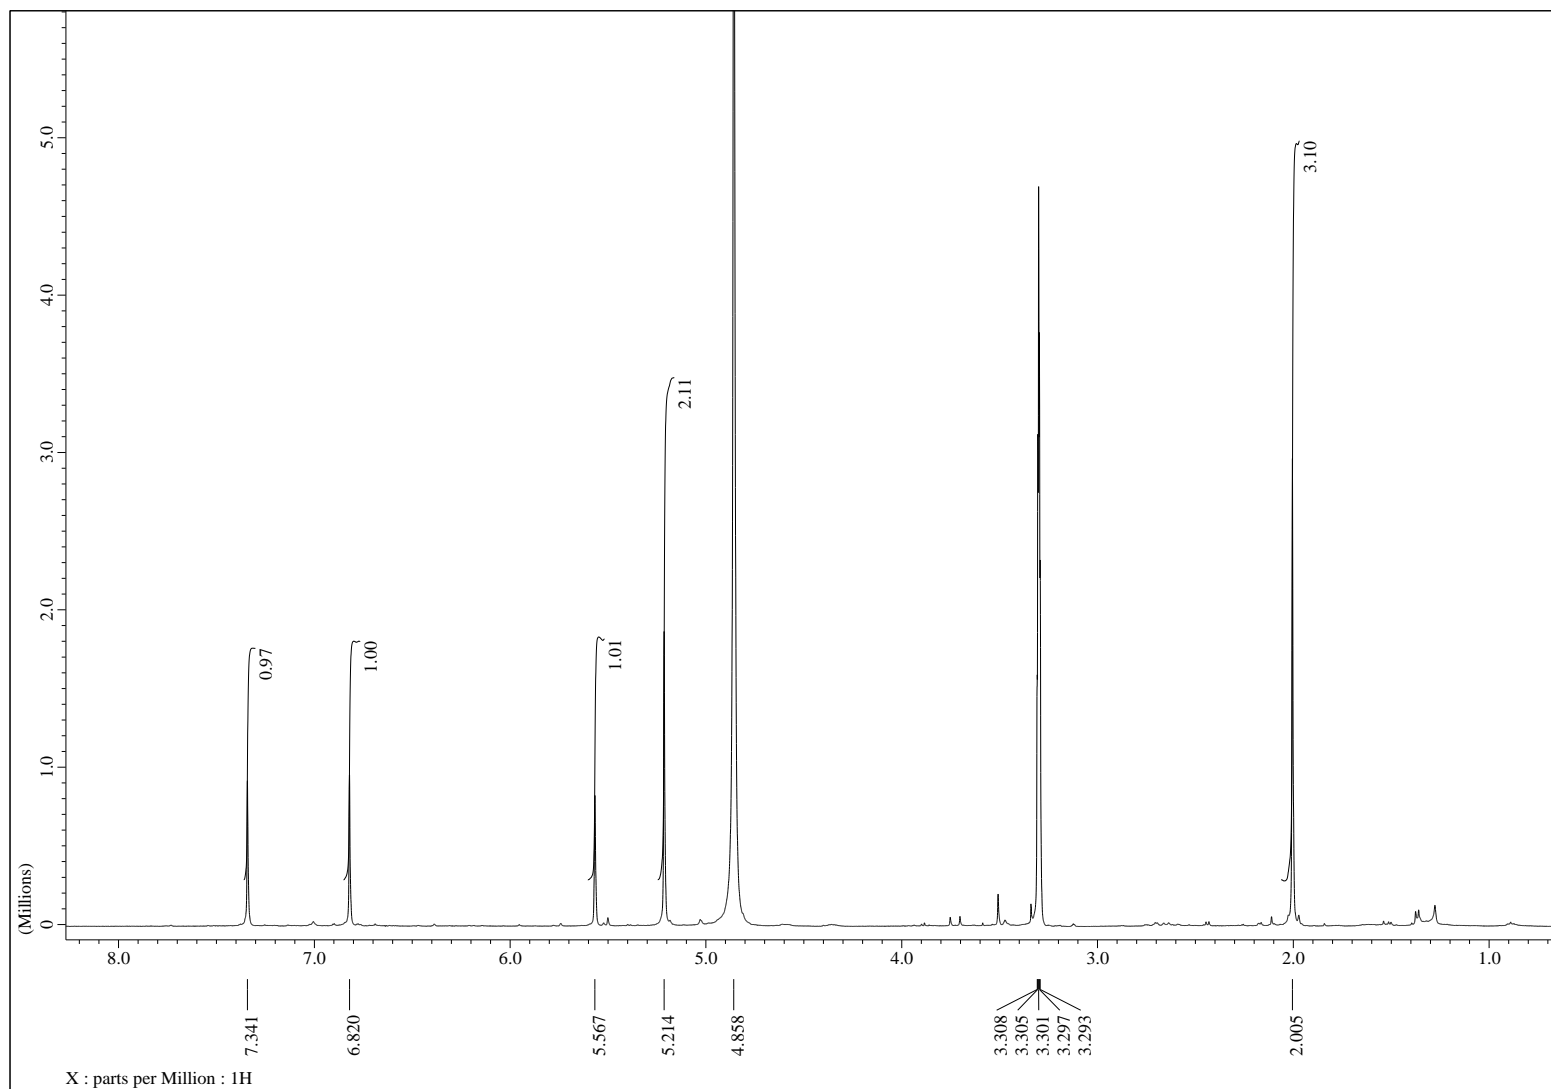

Figure S8.  $^1\text{H}$  NMR spectrum (400 MHz,  $\text{CD}_3\text{OD}$ ) of compound **4**

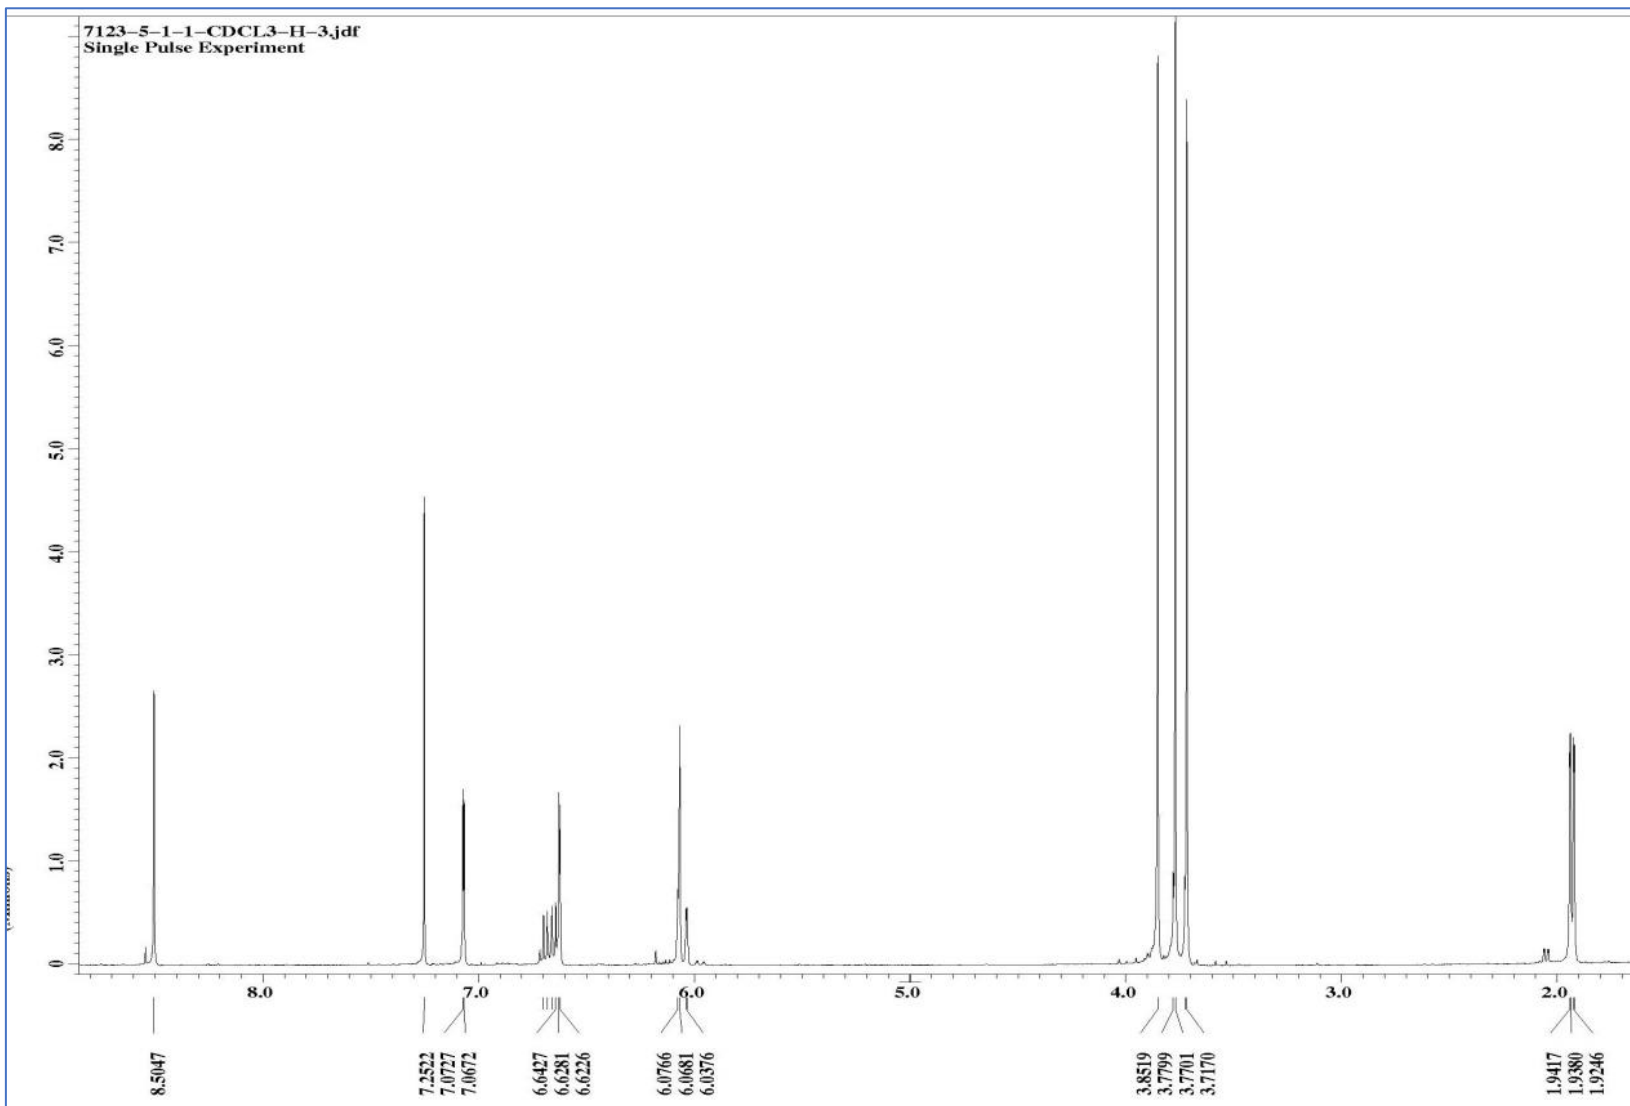

Figure S9.  $^1\text{H}$  NMR spectrum (400 MHz,  $\text{CDCl}_3$ ) of compound **5**  
S11
